# Supplementary material for: Crucial successes in drug delivery systems using multivariate chemometric approaches: challenges and opportunities
Source: Royal Society of Chemistry journal article supplement (doi:10.1039/c8nj06272b), 2019-01-01
Supplement: c8nj06272b1.pdf [file c8nj06272b1.pdf]

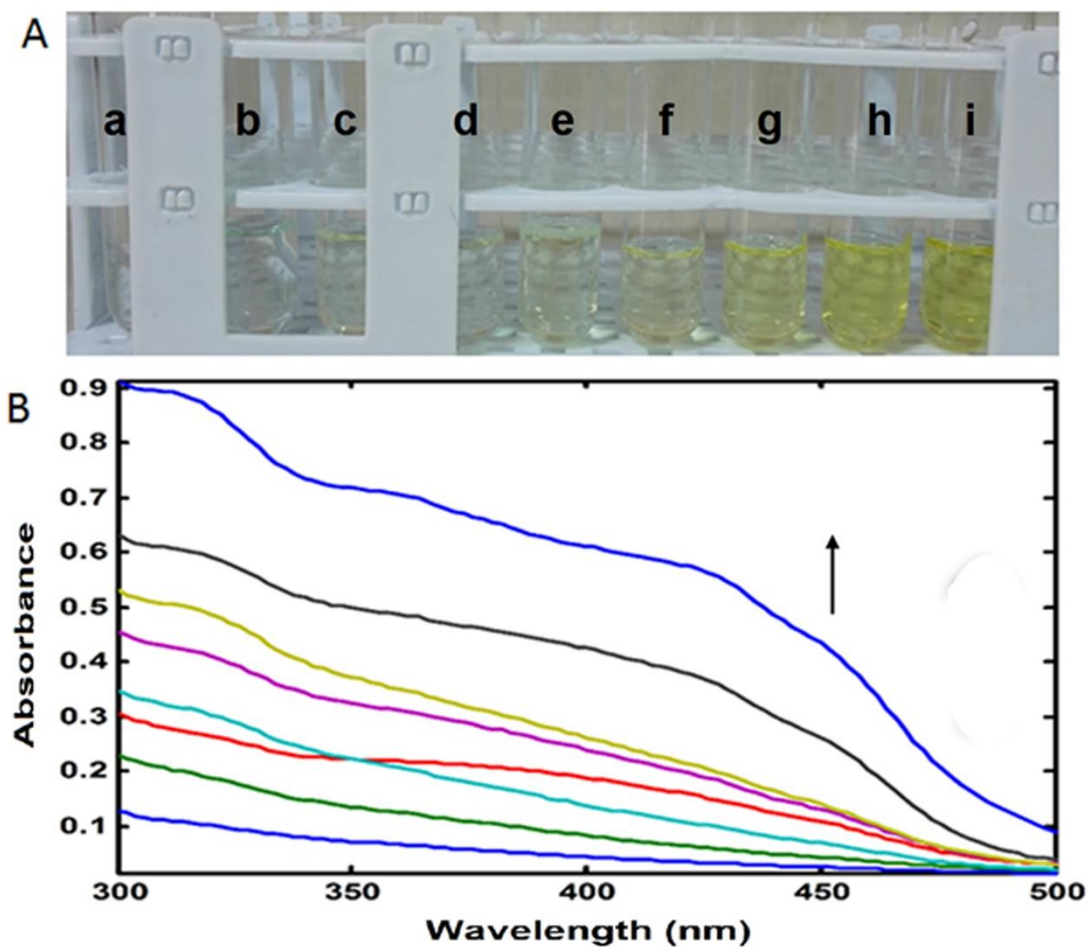

**Fig. S1** A) Photographs of supernatant solutions at different mole ratios of CUR/mPEG-PCL. Labels of (a) to (i) are referred to 0, 0.2, 0.4, 0.6, 0.8, 1, 1.4, 1.7 and 2.1 mole ratios. B) Supernatant solutions spectra after loading process at different mole ratio of CUR/mPEG-PCL

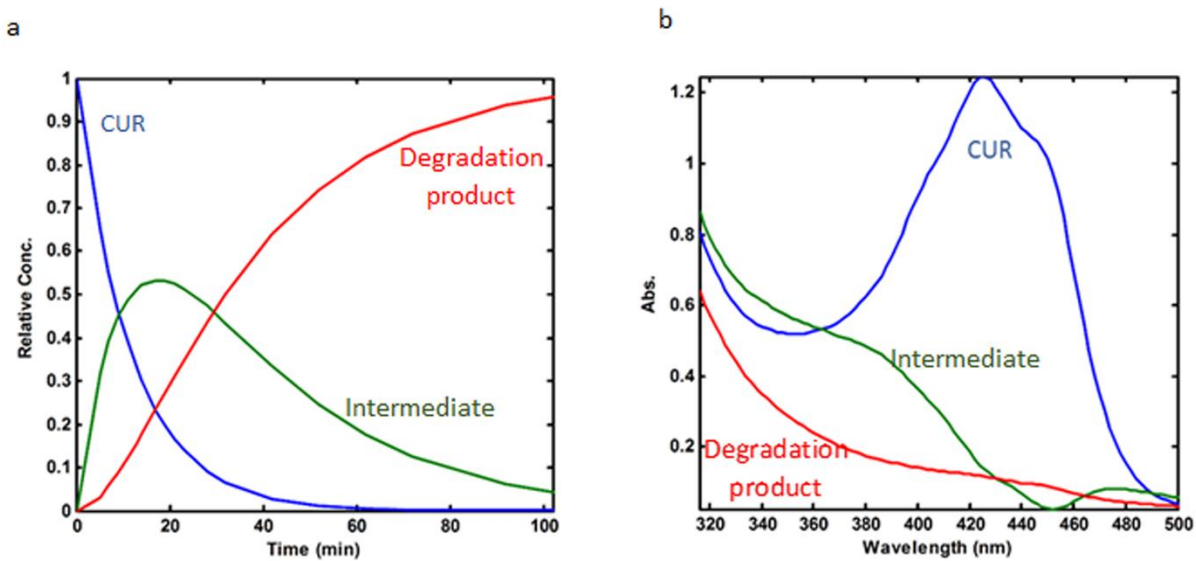

(B)

**Fig.S2** Data analysis by hard modeling (a) Kinetic degradation profiles of CUR by hard modeling (b) pure spectra of degradation species

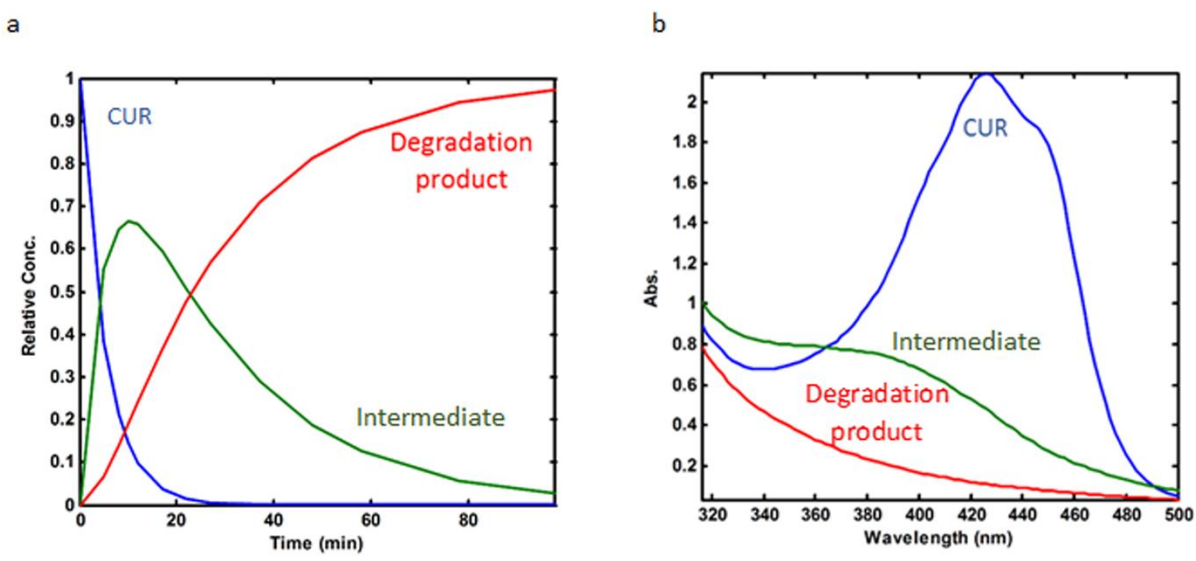

**Fig. S3** Obtained profiles by hard modeling method for the physical mixture of CUR and mPEG-PCL: Kinetic profiles (a) and spectra profiles (b)
